# Supplementary material for: Antidiabetic effects of selenium-enriched Bifidobacterium longum DD98 in type 2 diabetes model of mice
Source: Royal Society of Chemistry journal article supplement (doi:10.1039/d0fo00180e), 2020-01-01
Supplement: d0fo00180e1.pdf [file d0fo00180e1.pdf]

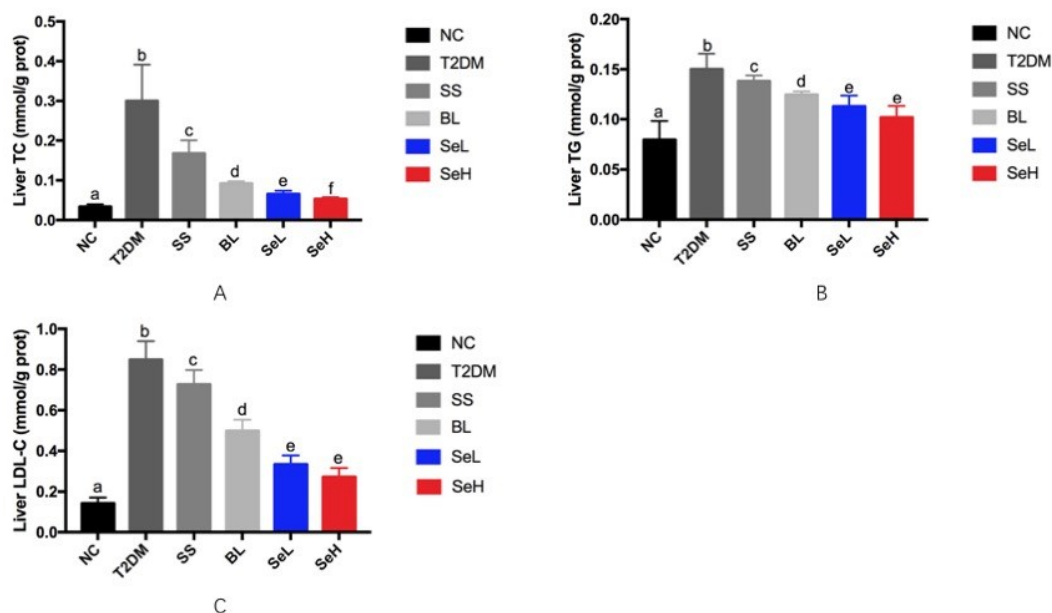

**Fig. S1** Effects of  $\text{Na}_2\text{SeO}_3$ , *B. longum* DD98, and Se-*B. longum* DD98 on the hepatic levels of TC (A), TG (B) and LDL-C (C). NC, normal control group; T2DM, model group; SS, sodium selenite group; BL, *B. longum* DD98 group; SeL, Se-*B. longum* DD98 low dosage group; SeH, Se-*B. longum* DD98 high dosage group. Values are expressed as mean  $\pm$  SD (n = 8). <sup>a-f</sup> Means with different letters differ significantly for the same indicator in liver after different treatments ( $p < 0.05$ ).

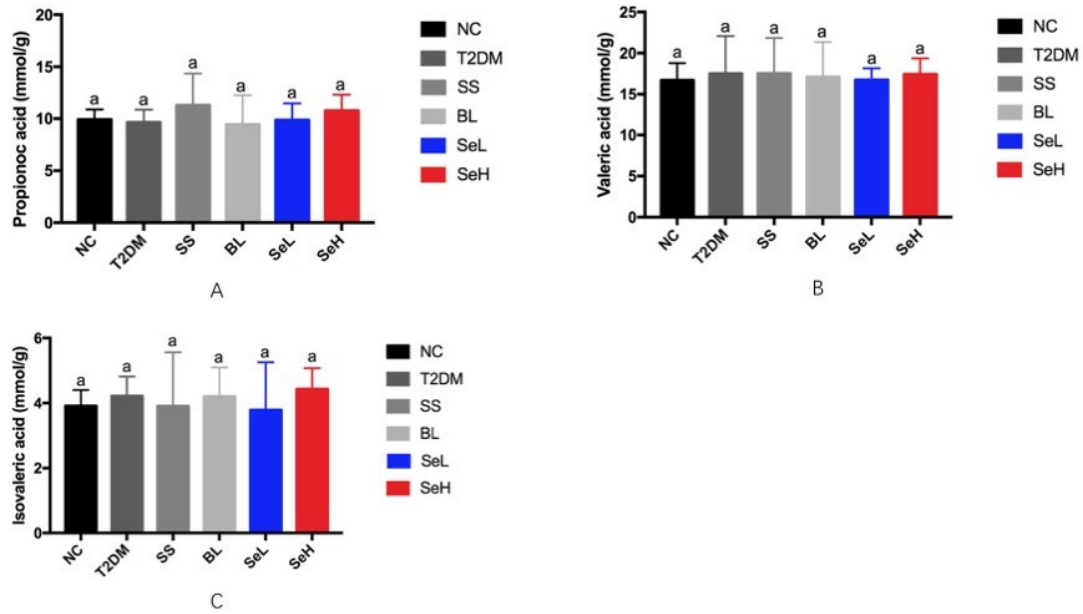

**Fig. S2** Effects of  $\text{Na}_2\text{SeO}_3$ , *B. longum* DD98, and Se-*B. longum* DD98 on levels of propionic acid (A), valeric acid (B), isovaleric acid (C) in mice feces. NC, normal control group; T2DM, model group; SS, sodium selenite group; BL, *B. longum* DD98 group; SeL, Se-*B. longum* DD98 low dosage group; SeH, Se-*B. longum* DD98 high dosage group. Values are expressed as mean  $\pm$  SD (n = 8). <sup>a-d</sup> Means with different letters differ significantly for the same SCFA in feces after different treatments ( $p < 0.05$ ).
